# Supplementary material for: Glycine-assisted synthesis of NiO hollow cage-like nanostructures for sensitive non-enzymatic glucose sensing
Source: Royal Society of Chemistry journal article supplement (doi:10.1039/c4ra15858j), 2015-01-01
Supplement: c4ra15858j1.pdf [file c4ra15858j1.pdf]

## Supplementary Data

### Glycine-assisted synthesis of NiO hollow cage-like nanostructures for sensitive non-enzymatic glucose sensing

Fig. S1

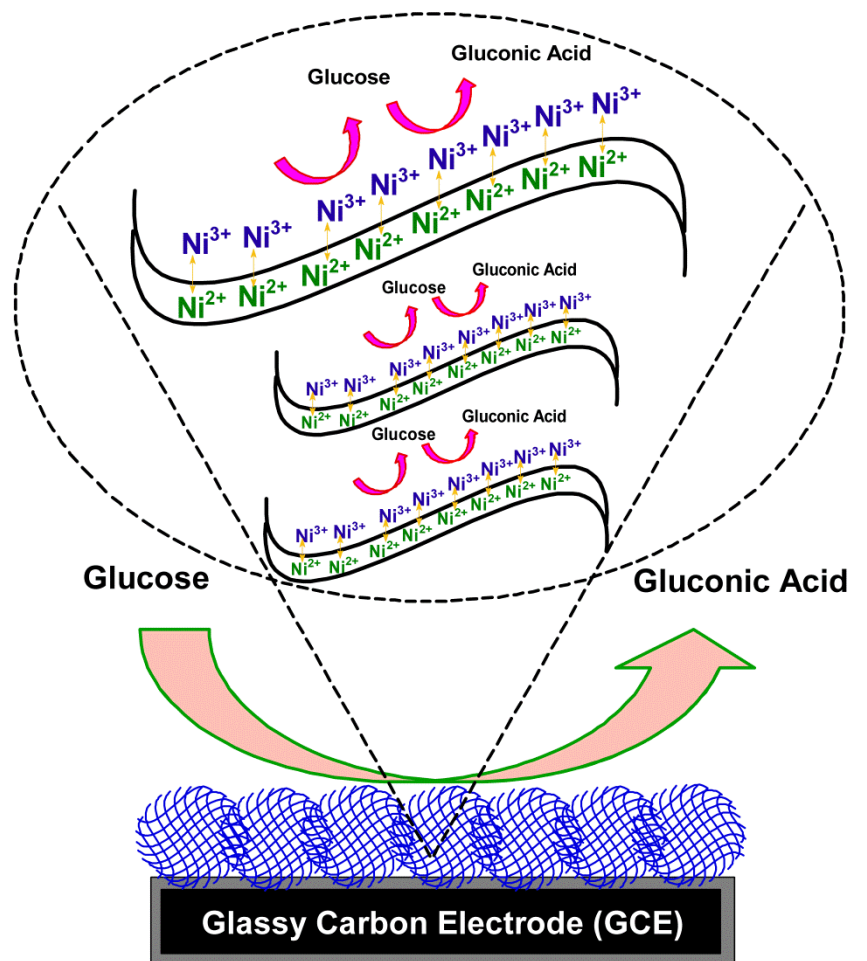

Fig.S1 Schematic Diagram for the NiO HCs-Nafion/GCE with simplified presentation of glucose sensing

Fig. S2

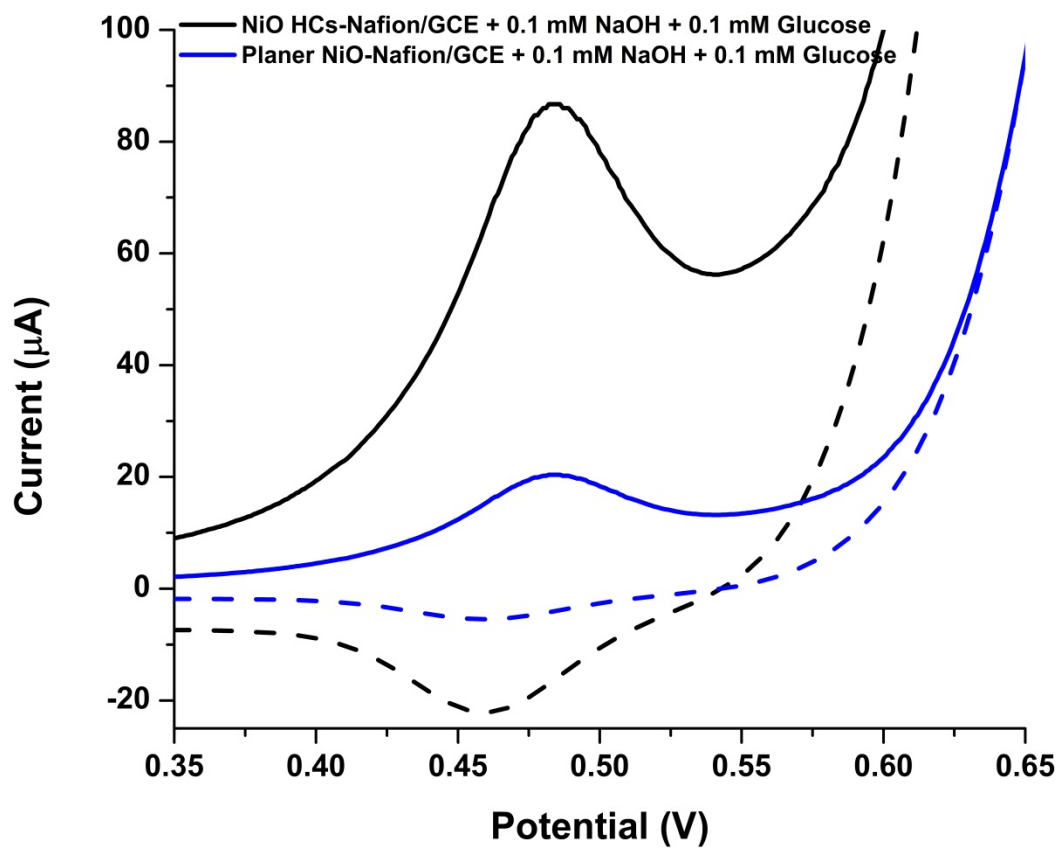

Fig.S2 CV profile for comparing current densities of both NiO HCs and Planer NiO modified GCE in the presence of 0.1 mM glucose solution
